# Supplementary material
Source: HighWire-hosted journal article supplement (https://erj.ersjournals.com/content/59/5/2103016)
Supplement: inline-supplementary-material-1 [file inline-supplementary-material-1.pdf]

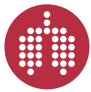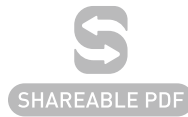

# Sputum cell counts in COPD patients who use electronic cigarettes

Andrew Higham <sup>1</sup>, Augusta Beech <sup>1</sup>, Natalie Jackson<sup>2</sup>, Simon Lea <sup>1</sup> and Dave Singh<sup>1,2</sup>

<sup>1</sup>Division of Immunology, Immunity to Infection and Respiratory Medicine, School of Biological Sciences, Faculty of Biology, Medicine and Health, University of Manchester and Manchester University NHS Foundation Trust, Manchester, UK. <sup>2</sup>Medicines Evaluation Unit, Manchester University NHS Foundation Trust, Manchester, UK.

Corresponding author: Andrew Higham ([Andrew.Higham@manchester.ac.uk](mailto:Andrew.Higham@manchester.ac.uk))

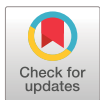

Shareable abstract (@ERSpublications)

**Electronic cigarette use in COPD ex-smokers causes increased sputum neutrophils**  
<https://bit.ly/3HPlisR>

**Cite this article as:** Higham A, Beech A, Jackson N, *et al.* Sputum cell counts in COPD patients who use electronic cigarettes. *Eur Respir J* 2022; 59: 2103016 [DOI: 10.1183/13993003.03016-2021].

This single-page version can be shared freely online.

Copyright ©The authors 2022. For reproduction rights and permissions contact [permissions@ersnet.org](mailto:permissions@ersnet.org)

Received: 25 Nov 2021  
Accepted: 7 Feb 2022

*To the Editor:*

COPD is caused by the inhalation of noxious particles, commonly from cigarette smoking [1]. Smoking cessation is an important part of COPD management. Electronic cigarettes (e-cigarettes) are used by COPD patients to facilitate cigarette smoking cessation [2]. E-cigarettes contain multiple chemicals that can cause inflammation and toxicity [3]. The potential harm caused by long term e-cigarette use in COPD patients is unknown.
